# Supplementary material for: Dendritic polyglutamic acid-chelerythrine nanocomplex for the reversal of bacterial tooth decay
Source: Royal Society of Chemistry journal article supplement (doi:10.1039/d4tb02748e), 2025-01-01
Supplement: d4tb02748e1.pdf [file d4tb02748e1.pdf]

## Supporting Information

### **Dendritic polyglutamic acid-chelerythrine nanocomplex for the reversal of bacterial tooth decay**

*Yan Zhang<sup>a,1</sup>, Yihua Liu<sup>a,1</sup>, Fan Fan<sup>a,1</sup>, Hongbo Zhang<sup>a</sup>, Qiangwei Xin<sup>a</sup>, Shiran Sun<sup>a</sup>, Xinyuan Xu<sup>a</sup>, Liwei Zheng<sup>b</sup>, Yang Liu<sup>a</sup>, Chunmei Ding<sup>a\*</sup>, Mingming Ding<sup>a\*</sup> and Jianshu Li<sup>a,b,c\*</sup>*

<sup>a</sup> College of Polymer Science and Engineering, State Key Laboratory of Polymer Materials Engineering, Sichuan University, Chengdu 610065, China

<sup>b</sup> State Key Laboratory of Oral Diseases, West China Hospital of Stomatology, Sichuan University, Chengdu 610041, China

<sup>c</sup> Med-X Center for Materials, Sichuan University, 610041, China

<sup>1</sup> These authors contribute equally to this work.

\* Author for correspondence:

Chunmei Ding, Ph.D

E-mail address: dingcm@scu.edu.cn

Mingming Ding, Ph.D

E-mail address: dmmshx@163.com

Jianshu Li, Ph.D

E-mail address: jianshu\_li@scu.edu.cn



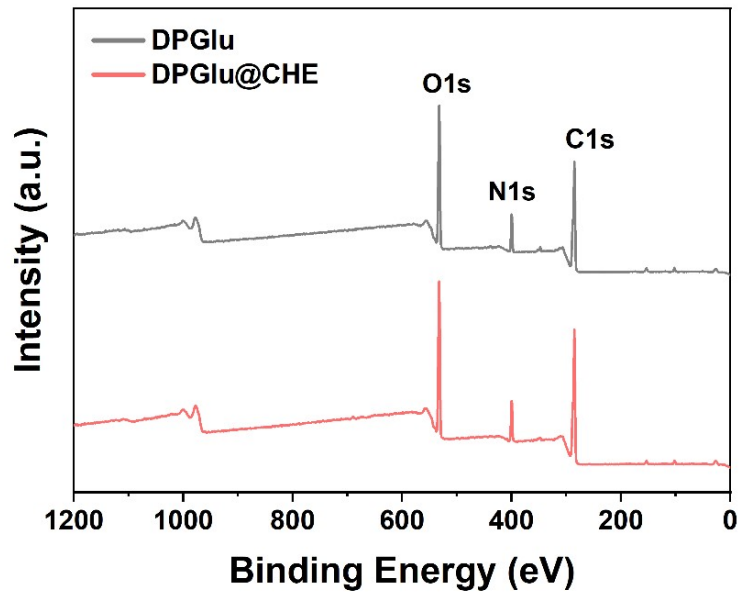

Fig S3. XPS spectra of DPGlu and DPGlu@CHE.

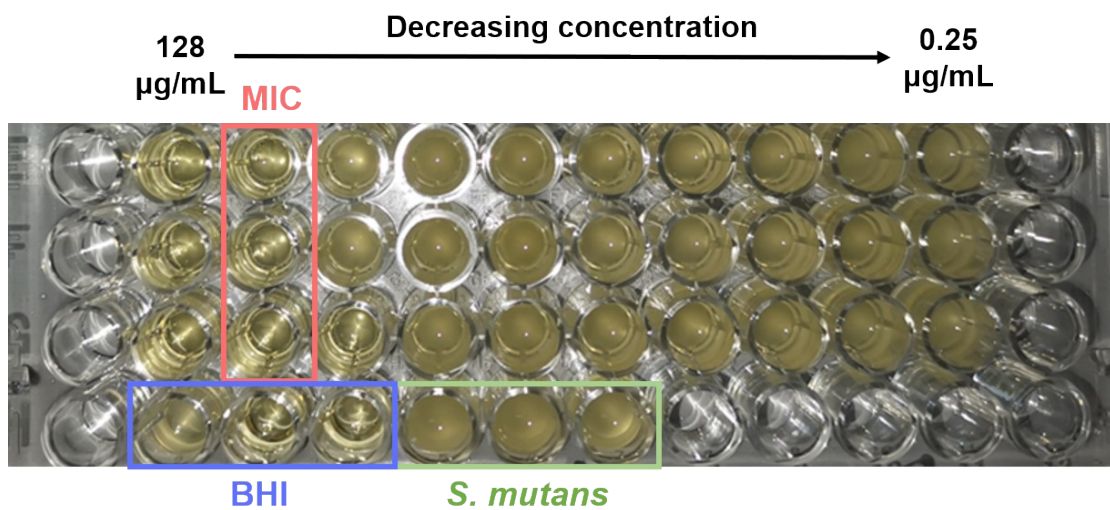

Fig. S4 Antibacterial experiments of CHE against *Streptococcus mutans*.

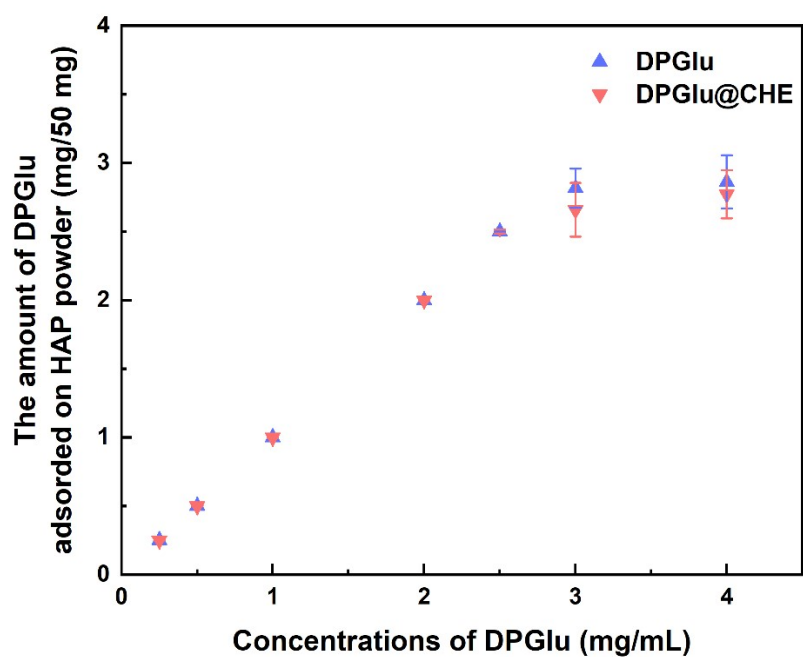

Fig. S5 The apparent absorption of DPGlu and DPGlu@CHE on HAP powders.

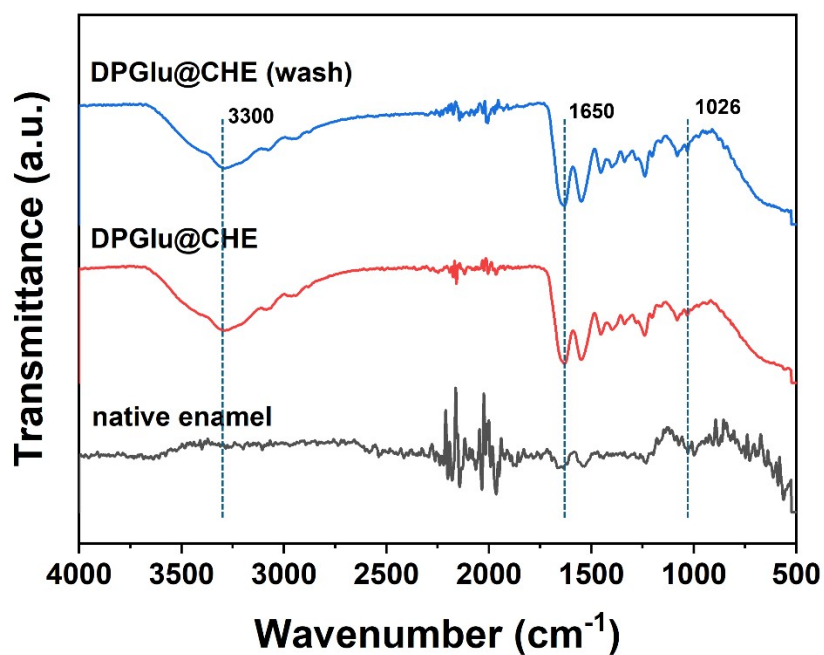

Fig. S6 ATR-IR spectra of acid-etched tooth enamel before/ after DPGlu@CHE modification and after washing.

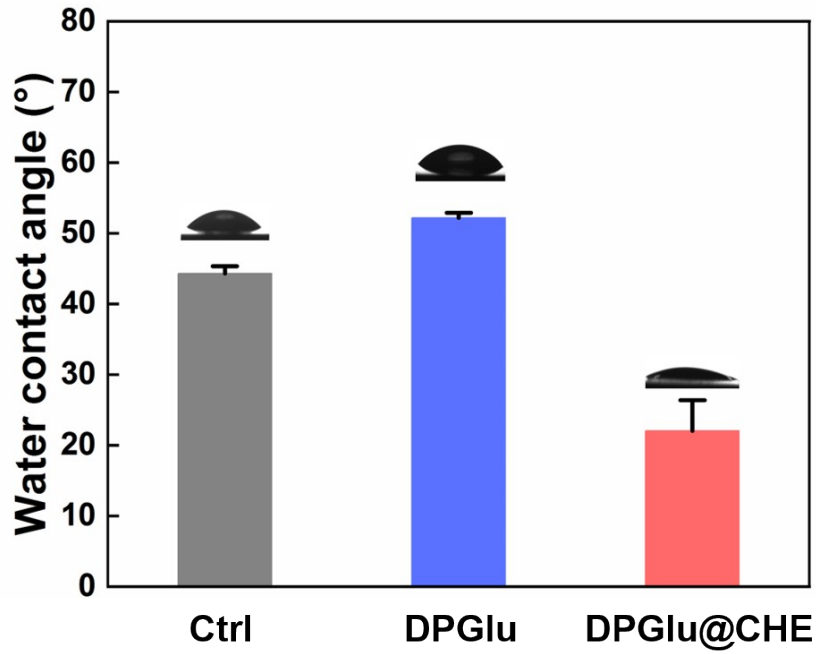

**Fig. S7** Water contact angle of intrinsic tooth enamel (Ctrl group), enamel modified with DPGLu (DPGLu group) and DPGLu@CHE (DPGLu@CHE group) respectively.

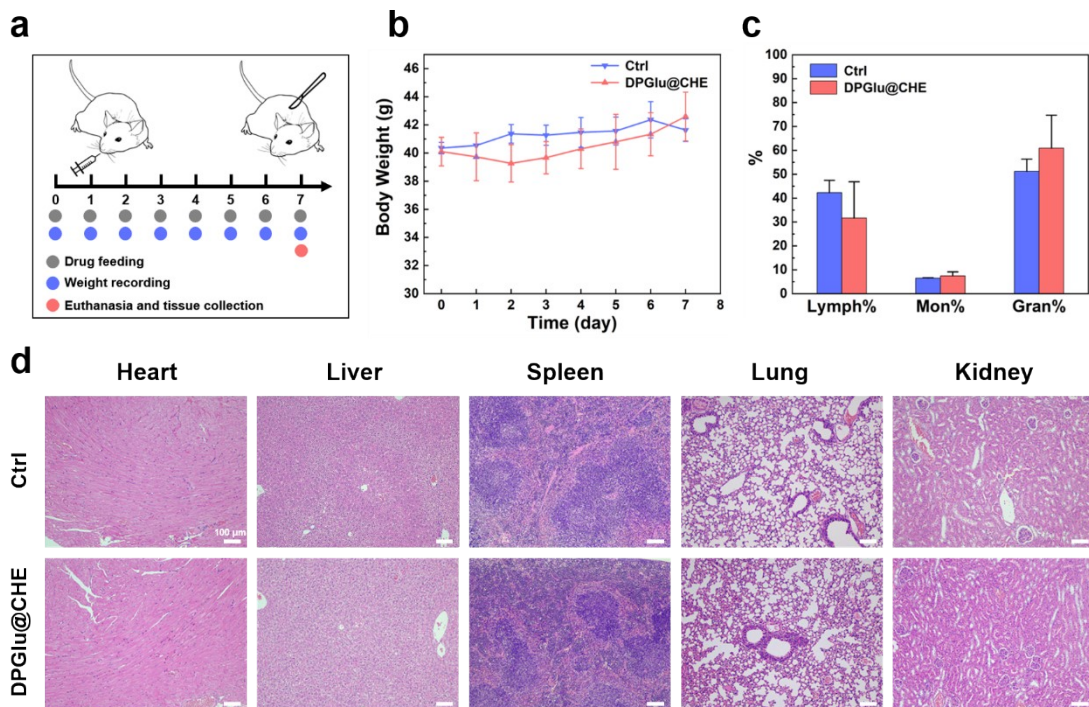

**Fig. S8** (a) Schematic illustration of the schedule for in vivo experiment. (b) The body weight of rats in control and DPGLu@CHE groups. (c) Blood routine analysis of rats. (d) H&E staining images of heart, liver, spleen, lung and kidney in each group.

| <b>Name</b>      | <b>Element</b> | <b>Atomic %</b> |
|------------------|----------------|-----------------|
| <b>DPGlu</b>     | <b>C</b>       | <b>62.47</b>    |
|                  | <b>N</b>       | <b>9.73</b>     |
|                  | <b>O</b>       | <b>27.8</b>     |
| <b>DPGlu@CHE</b> | <b>C</b>       | <b>63.62</b>    |
|                  | <b>N</b>       | <b>9.66</b>     |
|                  | <b>O</b>       | <b>26.72</b>    |

**Table S1.** Relative atomic content of DPGlu and DPGlu@CHE.
